# Supplementary material for: Enhanced electrocatalytic activity of low-cost NiO microflowers on graphene paper for the oxygen evolution reaction
Source: Royal Society of Chemistry journal article supplement (doi:10.1039/d2se00829g), 2022-01-01
Supplement: d2se00829g1.pdf [file d2se00829g1.pdf]

# Enhanced Electrocatalytic Activity of low-cost NiO Microflowers on Graphene Paper for Oxygen Evolution Reaction

*Luca Bruno<sup>1,2</sup>, Mario Scuderi<sup>3</sup>, Francesco Priolo<sup>1</sup>, Salvo Mirabella<sup>1,2\*</sup>*

<sup>1</sup> Dipartimento di Fisica e Astronomia “Ettore Majorana”, Università degli Studi di Catania,  
via S. Sofia 64, 95123, Catania, Italy

<sup>2</sup> IMM-CNR (Catania Università), via S. Sofia 64, 95123, Catania, Italy.

<sup>3</sup> IMM-CNR, VIII strada 5, 95121 Catania, Italy.

## **ELECTRONIC SUPPLEMENTARY INFORMATION**

### **Corresponding Author**

\*salvo.mirabella@dfa.unict.it

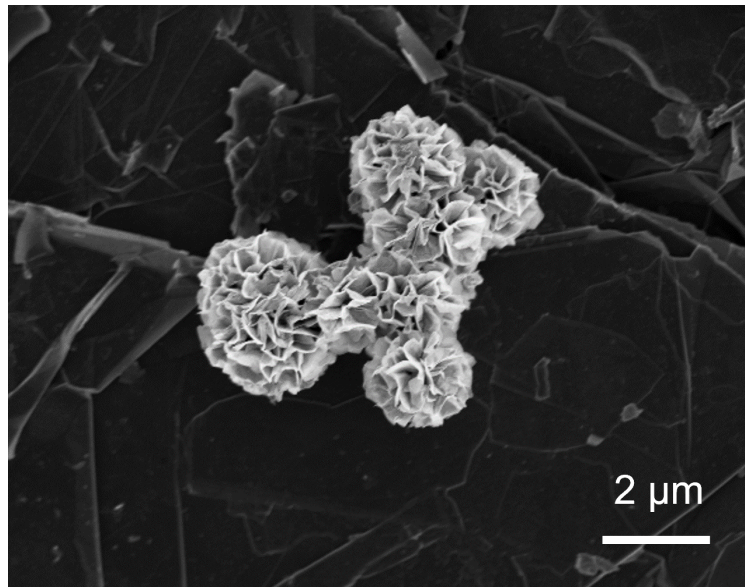

**Figure S1:** SEM images of NiO  $\mu$ Fs on GP after electrochemical tests.

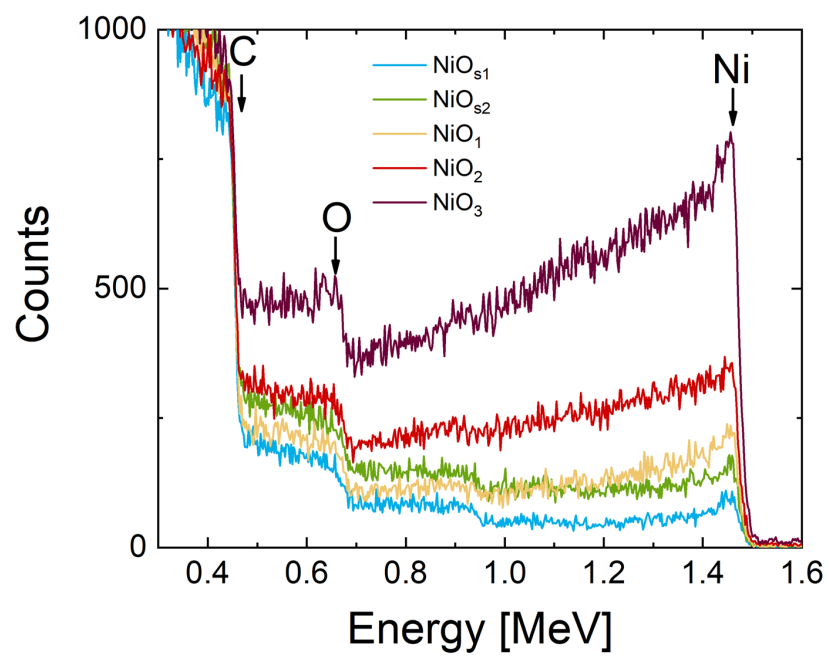

**Figure S2:** RBS spectra of NiO  $\mu$ Fs on GP.

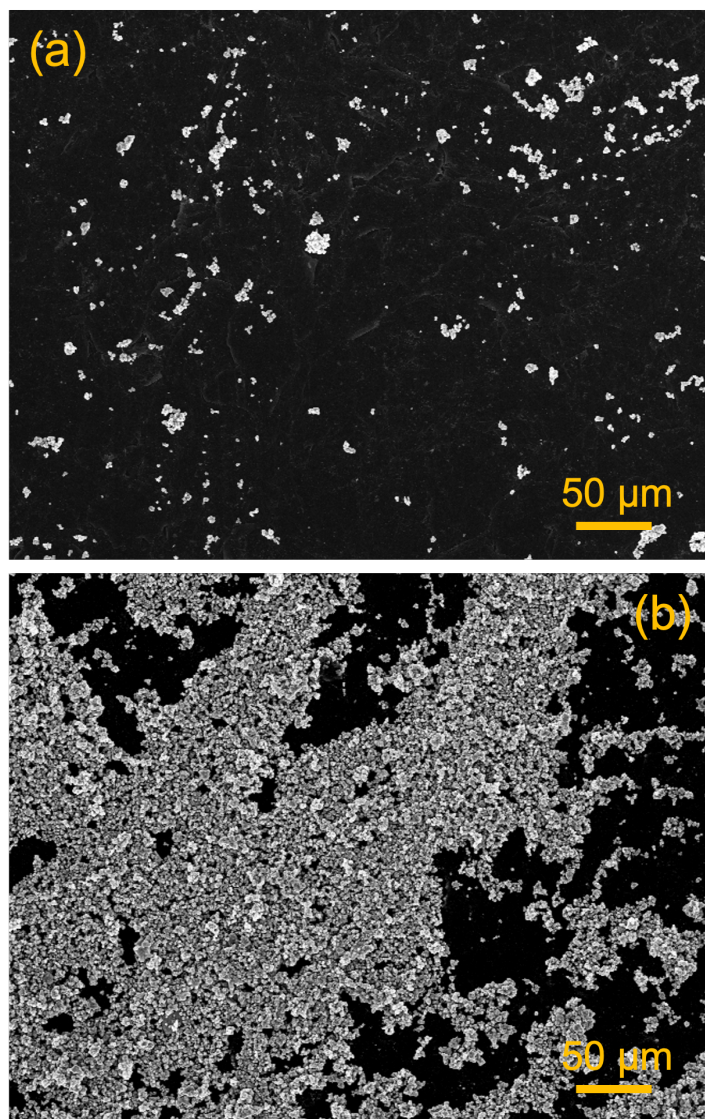

**Figure S3:** SEM images of NiO  $\mu$ Fs on GP deposited via (a) spin coating or (b) drop casting.

| Sample            | $R_u$ [ $\Omega$ ] | $R_{ct}$ [ $\Omega$ ] | $R_p$ [ $\Omega$ ] | $C_{dl}$ [ $mF s^{n-1}$ ] | $n_1$ | $C_p$ [ $mF s^{n-1}$ ] | $n_2$ |
|-------------------|--------------------|-----------------------|--------------------|---------------------------|-------|------------------------|-------|
| NiO <sub>s1</sub> | $4.67 \pm 0.01$    | $2.71 \pm 0.03$       | $18.6 \pm 0.1$     | $6.05 \pm 0.08$           | 0.8   | $2.38 \pm 0.04$        | 0.6   |
| NiO <sub>s2</sub> | $4.44 \pm 0.03$    | $2.00 \pm 0.06$       | $12.9 \pm 0.2$     | $6.93 \pm 0.2$            | 0.8   | $2.35 \pm 0.2$         | 0.6   |
| NiO <sub>D1</sub> | $5.47 \pm 0.02$    | $0.68 \pm 0.02$       | $13.1 \pm 0.1$     | $6.89 \pm 0.08$           | 0.8   | $1.84 \pm 0.05$        | 0.8   |
| NiO <sub>D2</sub> | $4.78 \pm 0.01$    | $0.61 \pm 0.03$       | $11.1 \pm 0.1$     | $7.3 \pm 0.1$             | 0.8   | $1.3 \pm 0.5$          | 0.7   |
| NiO <sub>D3</sub> | $4.54 \pm 0.01$    | $0.43 \pm 0.02$       | $10.3 \pm 0.1$     | $9.87 \pm 0.08$           | 0.9   | $0.62 \pm 0.06$        | 0.6   |

**Table S1:** EIS fitting parameters.

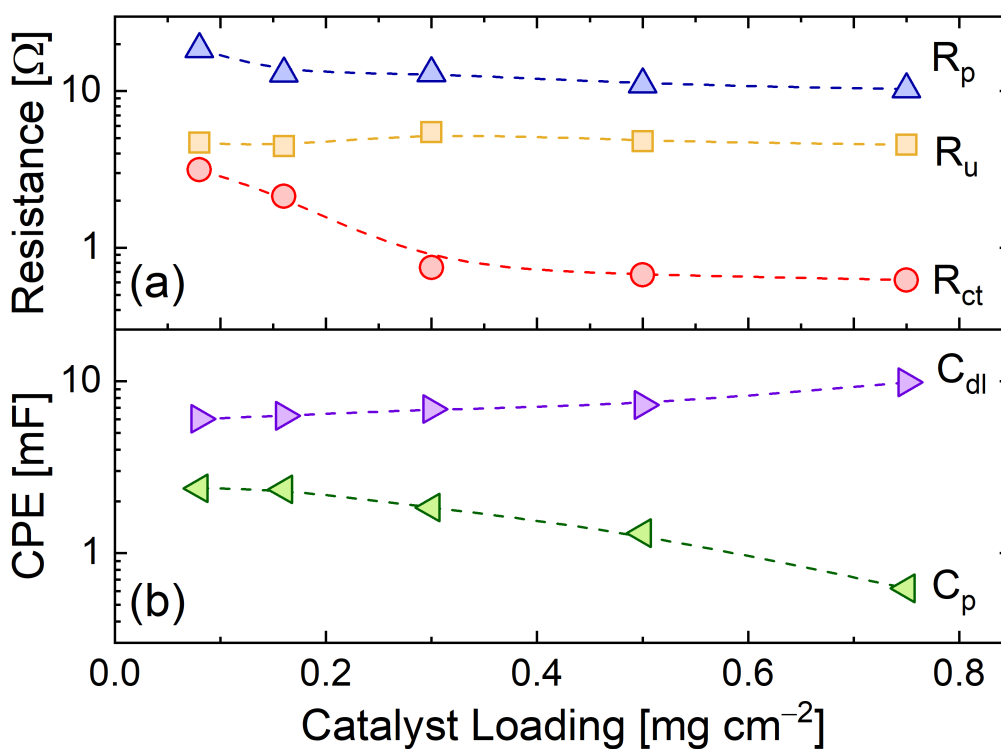

**Figure S4:** Behavior of equivalent circuit elements as a function of mass loading.

### OER MECHANISM AT NICKEL-BASED ELECTRODES.

Nickel-based materials are considered some of the most promising transition metal catalysts for the Oxygen Evolution Reaction (OER) in alkaline media<sup>1,2</sup>. Subsequently to the immersion of NiO electrodes in an aqueous solution a layer of Ni(OH)<sub>2</sub> is spontaneously formed at open circuit potential<sup>2</sup>. During the oxidation/reduction cycling the Ni hydroxide layer grows after the conversion of Ni(II) to Ni(III) and the formation of NiOOH during the charge step and the re-formation of Ni(OH)<sub>2</sub> during the discharge step of the cyclic voltammetry<sup>3</sup>. The charge/discharge process of the NiO/ Ni(OH)<sub>2</sub> electrode can be described as follows<sup>4</sup>:

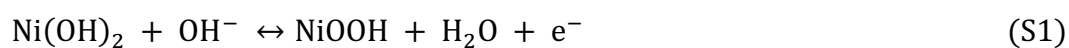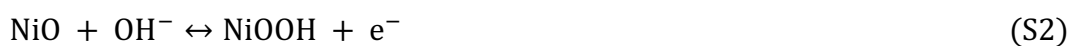

Upon the growth of the Ni(OH)<sub>2</sub> layer, a significant increase in the OER activity is generally observed for a hydrous nickel oxide electrodes<sup>5</sup>. Besides the formation of a stable and optimal

Ni(OH)<sub>2</sub> layer and the formation of different charge/discharge phases<sup>6</sup> after potential cycling, an increase of roughness and of the number of electrochemically active sites on surface is observed<sup>1</sup>.

In terms of a mechanistic analysis of the OER, the major difficulty is represented by the fact that the OER is a complex process involving the transfer of four electrons. Since electrons are transferred one by one, the process will be multistep<sup>7</sup>. Among different proposed mechanisms present in literature, Lyons *et al.*<sup>2,7,8</sup> suggested a mechanistic pathway which involves intermediate species in the Ni(III) valence state. For the case of anodic oxide covered Ni anodes such a pathway might be written as follows<sup>9</sup>:

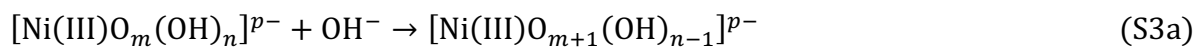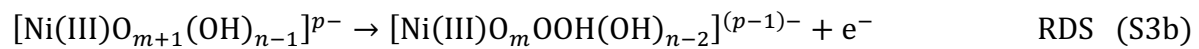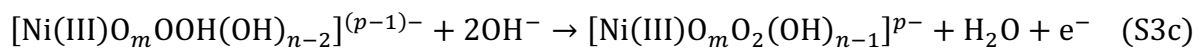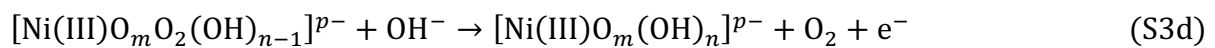

According to this mechanism the rate determining step (RDS) for the OER is represented by the formation of a superoxy-(OOH) species by the addition of an OH<sup>-</sup> ion on top of an adsorbed oxygen atom with a Tafel slope of around 40 mV dec<sup>-1</sup>.

### MASS ACTIVITY DETERMINATION.

Mass activity is defined as the ratio between a fixed current density  $j$  and the catalyst loading. In our case we calculate the mass activity at a current density of 10 mA cm<sup>-2</sup> by using the following expression:

$$\text{Mass activity} = \frac{j [\text{A cm}^{-2}]}{\text{catalyst loading} [\text{mg cm}^{-2}]} \quad (\text{S4})$$

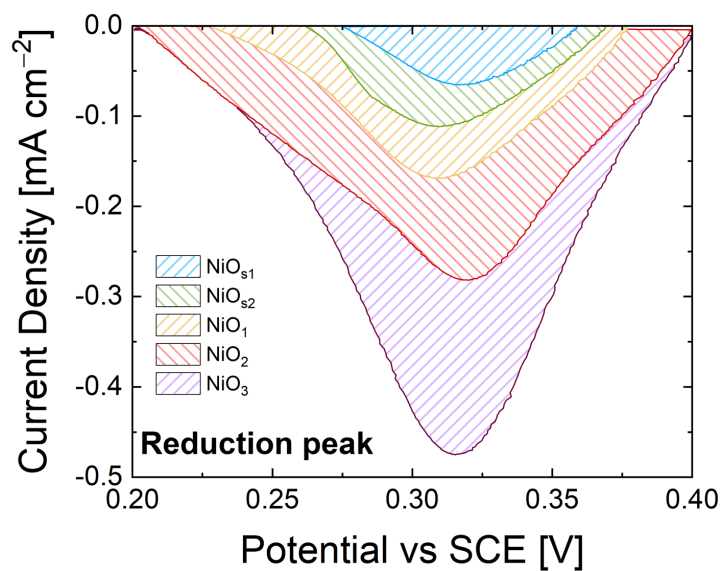

**Figure S5:** Reduction peaks of NiO electrodes after the first backward scan during CV.

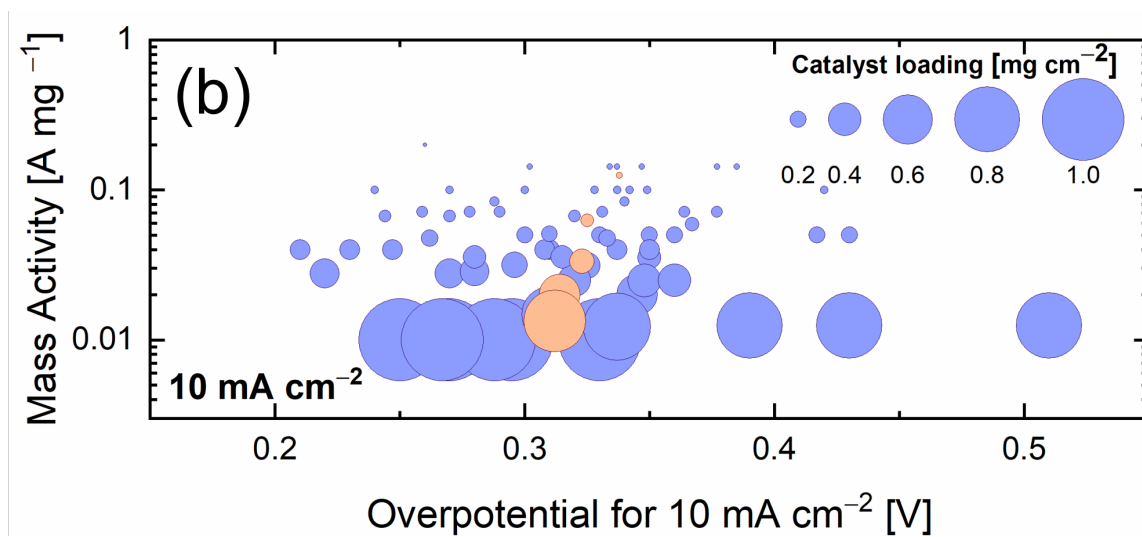

**Figure S6:** Mass activity at  $10 \text{ mA cm}^{-2}$  as a function of the overpotential and the catalyst loading [adapted from 10].

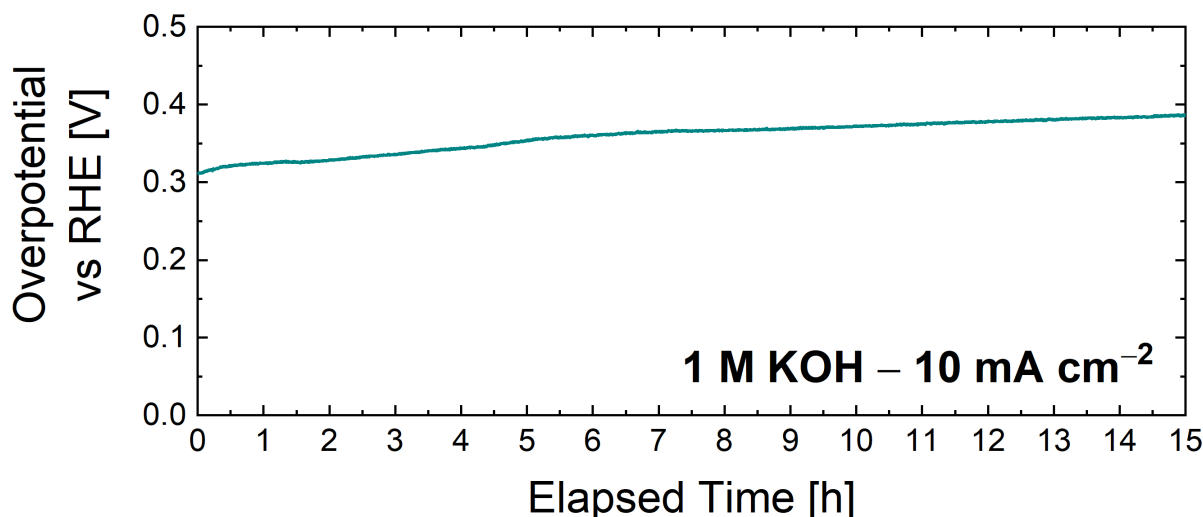

**Figure S7:** Chronopotentiometric test of NiO<sub>D2</sub> electrode.

## REFERENCES

1. E. Fabbri, A. Habereder, K. Waltar, R. Kötz and T. J. Schmidt, *Catal. Sci. Technol.*, 2014, DOI:10.1039/c4cy00669k.
2. M. E. G. Lyons and M. P. Brandon, *Int. J. Electrochem. Sci.*, 2008, 3, 1425-1462.
3. D. S. Hall, D. J. Lockwood, C. Bock and B. R. MacDougall, *Proc. R. Soc. A Math. Phys. Eng. Sci.*, 2015, DOI:10.1098/rspa.2014.0792.
4. S. Cosentino, M. Urso, G. Torrisi, S. Battiato, F. Priolo, A. Terrasi and S. Mirabella, *Mater. Adv.*, 2020, DOI:10.1039/d0ma00467g.
5. I. J. Godwin and M. E. G. Lyons, *Electrochem. commun.*, 2013, DOI:10.1016/j.elecom.2013.03.040.
6. H. Bode, K. Dehmelt and J. Witte, *Electrochim. Acta*, 1966, DOI:10.1016/0013-4686(66)80045-2.
7. R. L. Doyle and M. E. G. Lyons, in *Photoelectrochemical Solar Fuel Production: From Basic Principles to Advanced Devices*, 2016.
8. R. L. Doyle, I. J. Godwin, M. P. Brandon and M. E. G. Lyons, *Phys. Chem. Chem. Phys.*, 2013, DOI:10.1039/c3cp51213d.

9. M. E. G. Lyons and M. P. Brandon, *J. Electroanal. Chem.*, 2010,

DOI:10.1016/j.jelechem.2009.11.024.

10. J. Kibsgaard and I. Chorkendorff, *Nat. Energy*, 2019, DOI:10.1038/s41560-019-0407-1.
